# Supplementary material
Source: PubMed Central journal article supplement (PMC4572367)
Supplement: intro.pdf [file intro.pdf]

Four spatiotemporal maps are converted to movies. Upon opening the movies, the spatiotemporal map is shown together with the movie on top. While the movie is running a white line traverses the map, in synchrony with the movie. The movies show the changes in diameter along the intestinal segment over time. In the movies, black is contraction, white is relaxation. Note that the only difference between S1, S3 and S4 is in the  $v_{\text{dmp}}$ , the apparent propagation velocity of the DMP component.

**Supplemental Movie S1.mov** (Cannon type segmentation)

A spatiotemporal map is shown with on top a movie that shows the amplitude profile along the intestine changing over time. Map and profile of model with parameters as follows:  $A_{\text{dmp}} = 8$ ;  $\omega_{\text{dmp}} = 2 \text{ min}^{-1}$ ;  $v_{\text{dmp}} = 0.03 \text{ cm/s}$ ;  $\alpha = 0$ ;  $\omega_{\text{mp}} = 30 \text{ min}^{-1}$ ;  $v_{\text{mp}} = 0.9 \text{ cm/s}$ ;  $B = 2$ ;  $h = 5$ ;  $c = 0.5$ ;  $w = 0.2$ .

**Supplemental Movie S2.mov** (slow wave driven propagation)

A spatiotemporal map is shown with on top a movie that shows the amplitude profile along the intestine changing over time. Map and profile of model with parameters as follows:  $A_{\text{dmp}} = 0$ ;  $\omega_{\text{dmp}} = 0 \text{ min}^{-1}$ ;  $v_{\text{dmp}} = 0 \text{ cm/s}$ ;  $\alpha = 0$ ;  $\omega_{\text{mp}} = 30 \text{ min}^{-1}$ ;  $v_{\text{mp}} = 0.9 \text{ cm/s}$ ;  $B = 2$ ;  $h = 5$ ;  $c = 0.5$ ;  $w = 0.2$ .

**Supplemental Movie S3.mov** (segmentation-2)

A spatiotemporal map is shown with on top a movie that shows the amplitude profile along the intestine changing over time. Map and profile of model with parameters as follows:  $A_{\text{dmp}} = 8$ ;  $\omega_{\text{dmp}} = 2 \text{ min}^{-1}$ ;  $v_{\text{dmp}} = 0.1 \text{ cm/s}$ ;  $\alpha = 0$ ;  $\omega_{\text{mp}} = 30 \text{ min}^{-1}$ ;  $v_{\text{mp}} = 0.9 \text{ cm/s}$ ;  $B = 2$ ;  $h = 5$ ;  $c = 0.5$ ;  $w = 0.2$ .

**Supplemental Movie S4.mov** (clustered propagation)

A spatiotemporal map is shown with on top a movie that shows the amplitude profile along the intestine changing over time. Map and profile of model with parameters as follows:  $A_{\text{dmp}} = 8$ ;  $\omega_{\text{dmp}} = 2 \text{ min}^{-1}$ ;  $v_{\text{dmp}} = 0.8 \text{ cm/s}$ ;  $\alpha = 0$ ;  $\omega_{\text{mp}} = 30 \text{ min}^{-1}$ ;  $v_{\text{mp}} = 0.9 \text{ cm/s}$ ;  $B = 2$ ;  $h = 5$ ;  $c = 0.5$ ;  $w = 0.2$ . Note that the only difference between S1, S3 and S4 is in the  $v_{\text{dmp}}$ , the apparent propagation velocity of the DMP component.
